# Supplementary material for: Glioblastoma: two immune subtypes under the surface of the cold tumor
Source: Aging (Albany NY). 2022 May 23;14(10):4357–75. doi: 10.18632/aging.204067 (PMC9186767; doi:10.18632/aging.204067)
Supplement: Supplementary Figures [file aging-14-204067-s001.pdf]

SUPPLEMENTARY FIGURES

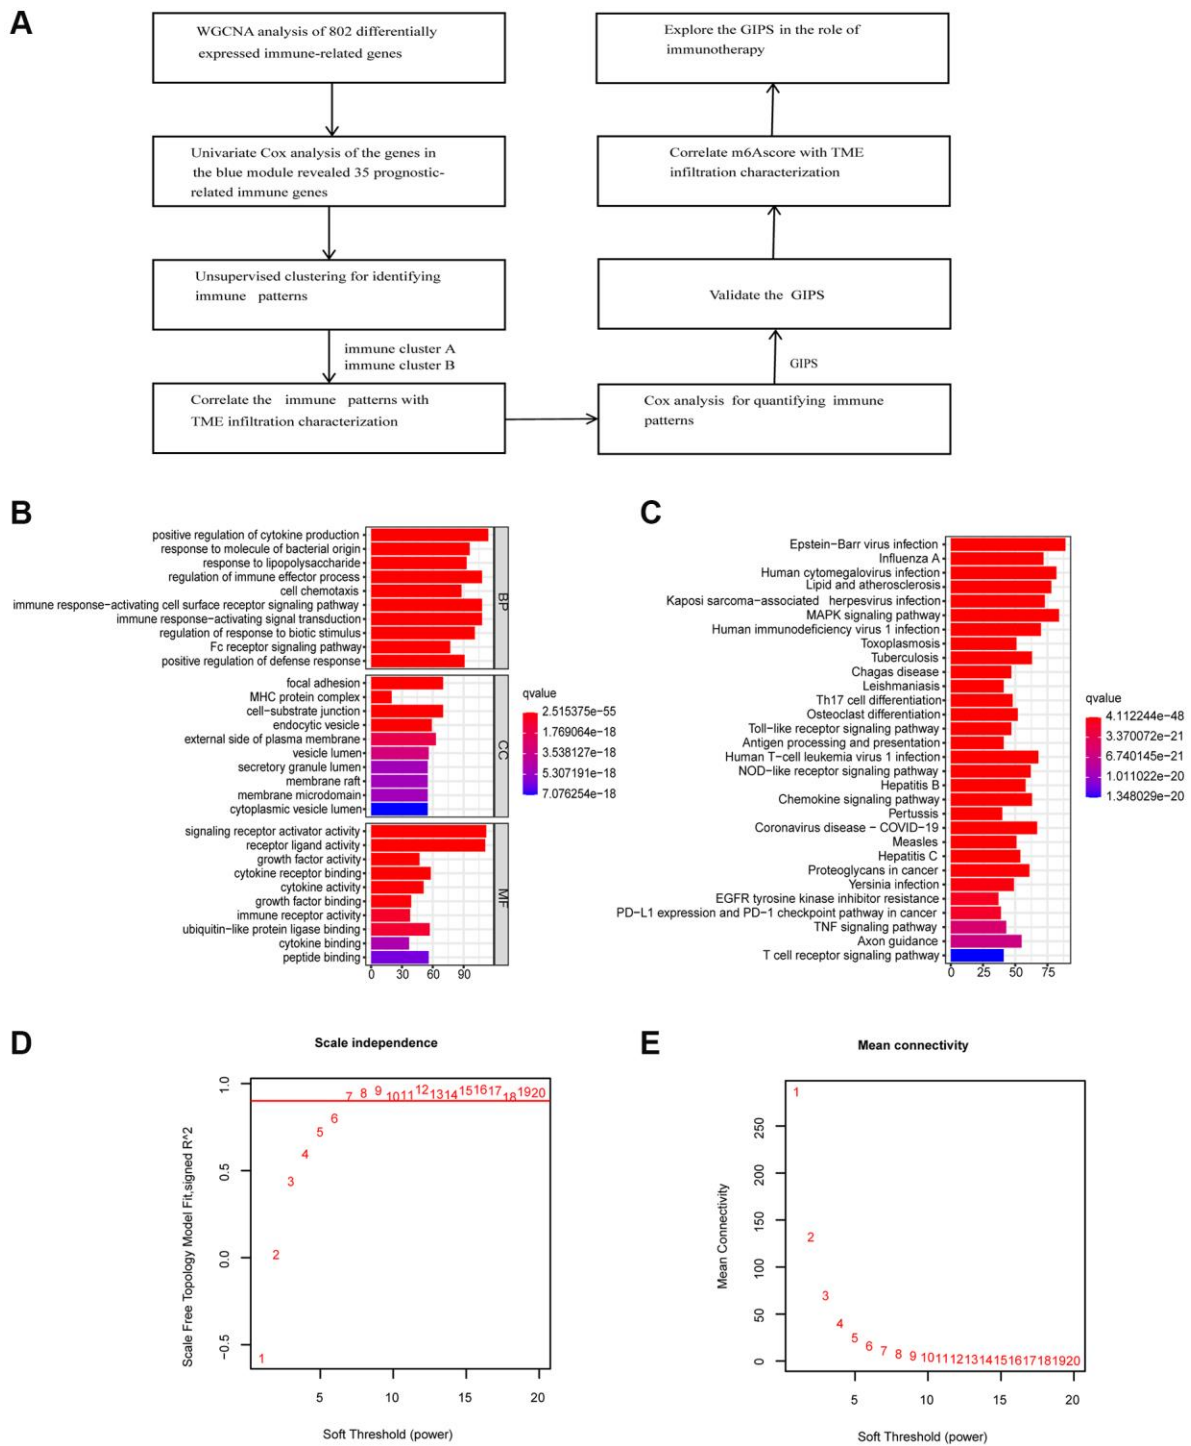

**Supplementary Figure 1. Differentially expressed immune-related genes in GBM.** (A) This study's design overview. (B) GO enrichment analysis of the immune-related DEGs. (C) KEGG enrichment analysis of the immune-related DEGs. (D) The horizontal line denotes a threshold value of 0.9. (E) WGCNA's optimal soft threshold is 7.

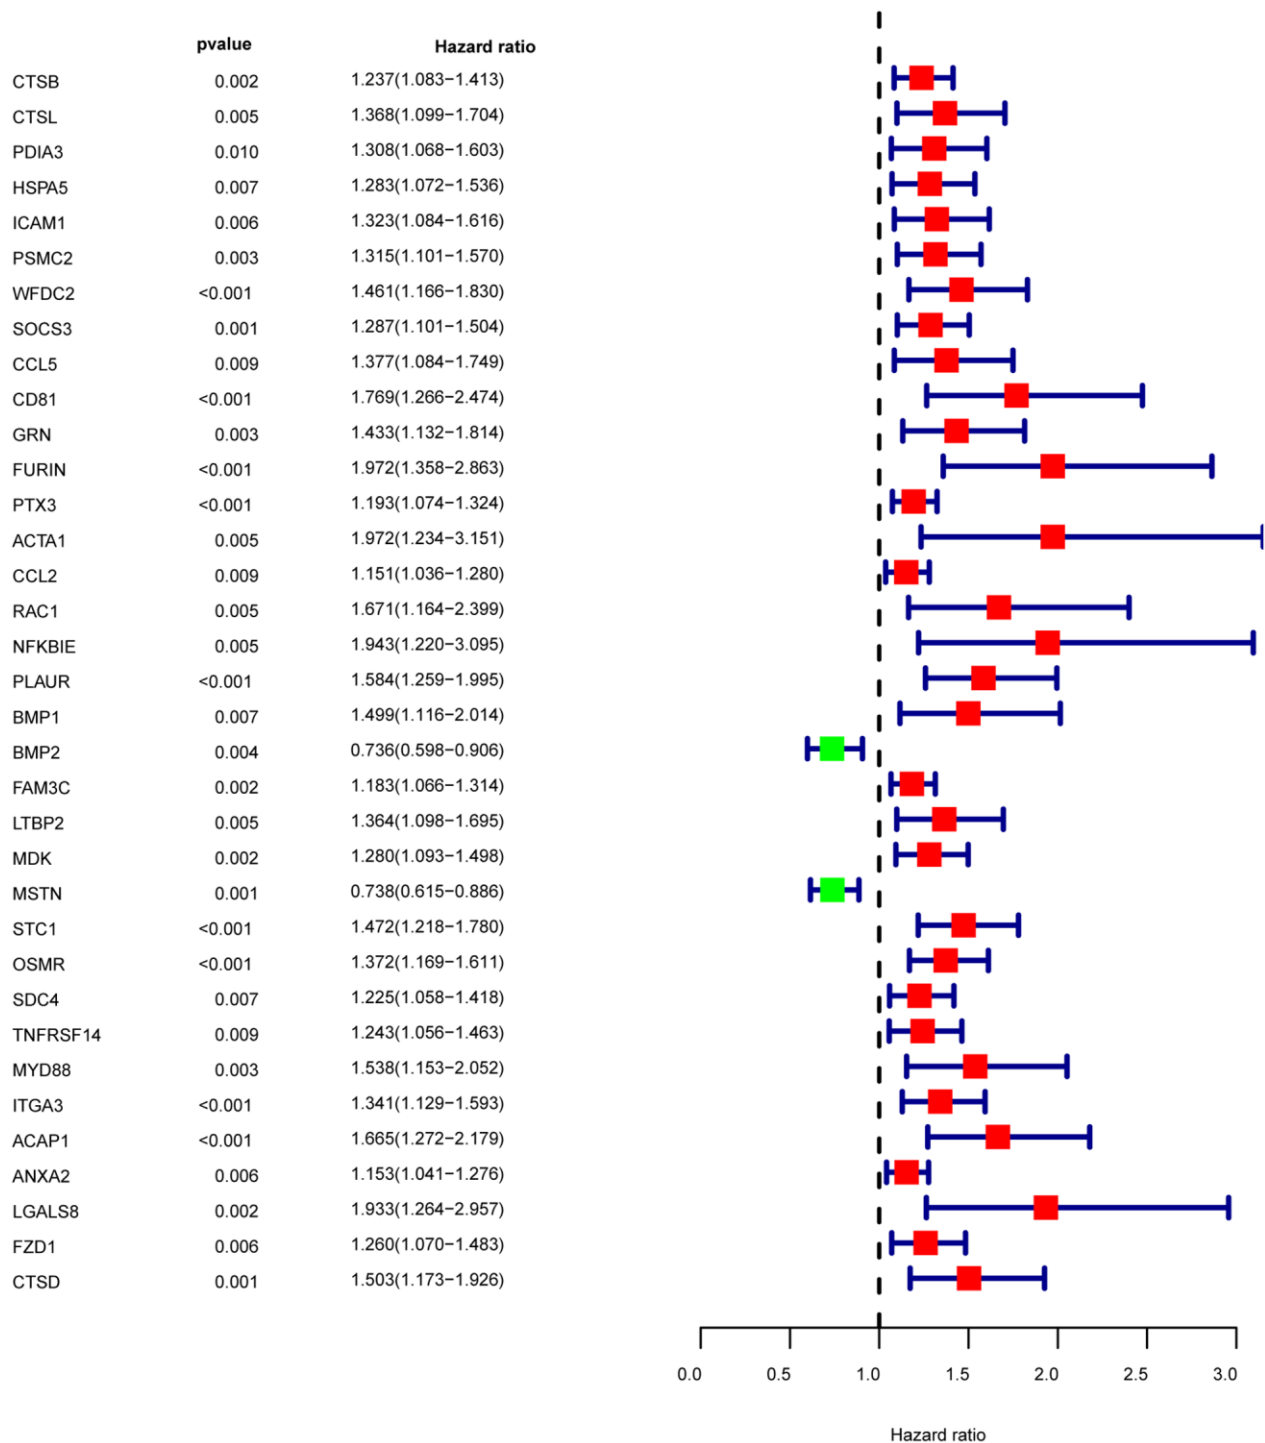

**Supplementary Figure 2. Univariate Cox analysis of the genes in the blue module.** Forest plot of 35 immune-related prognostic genes.

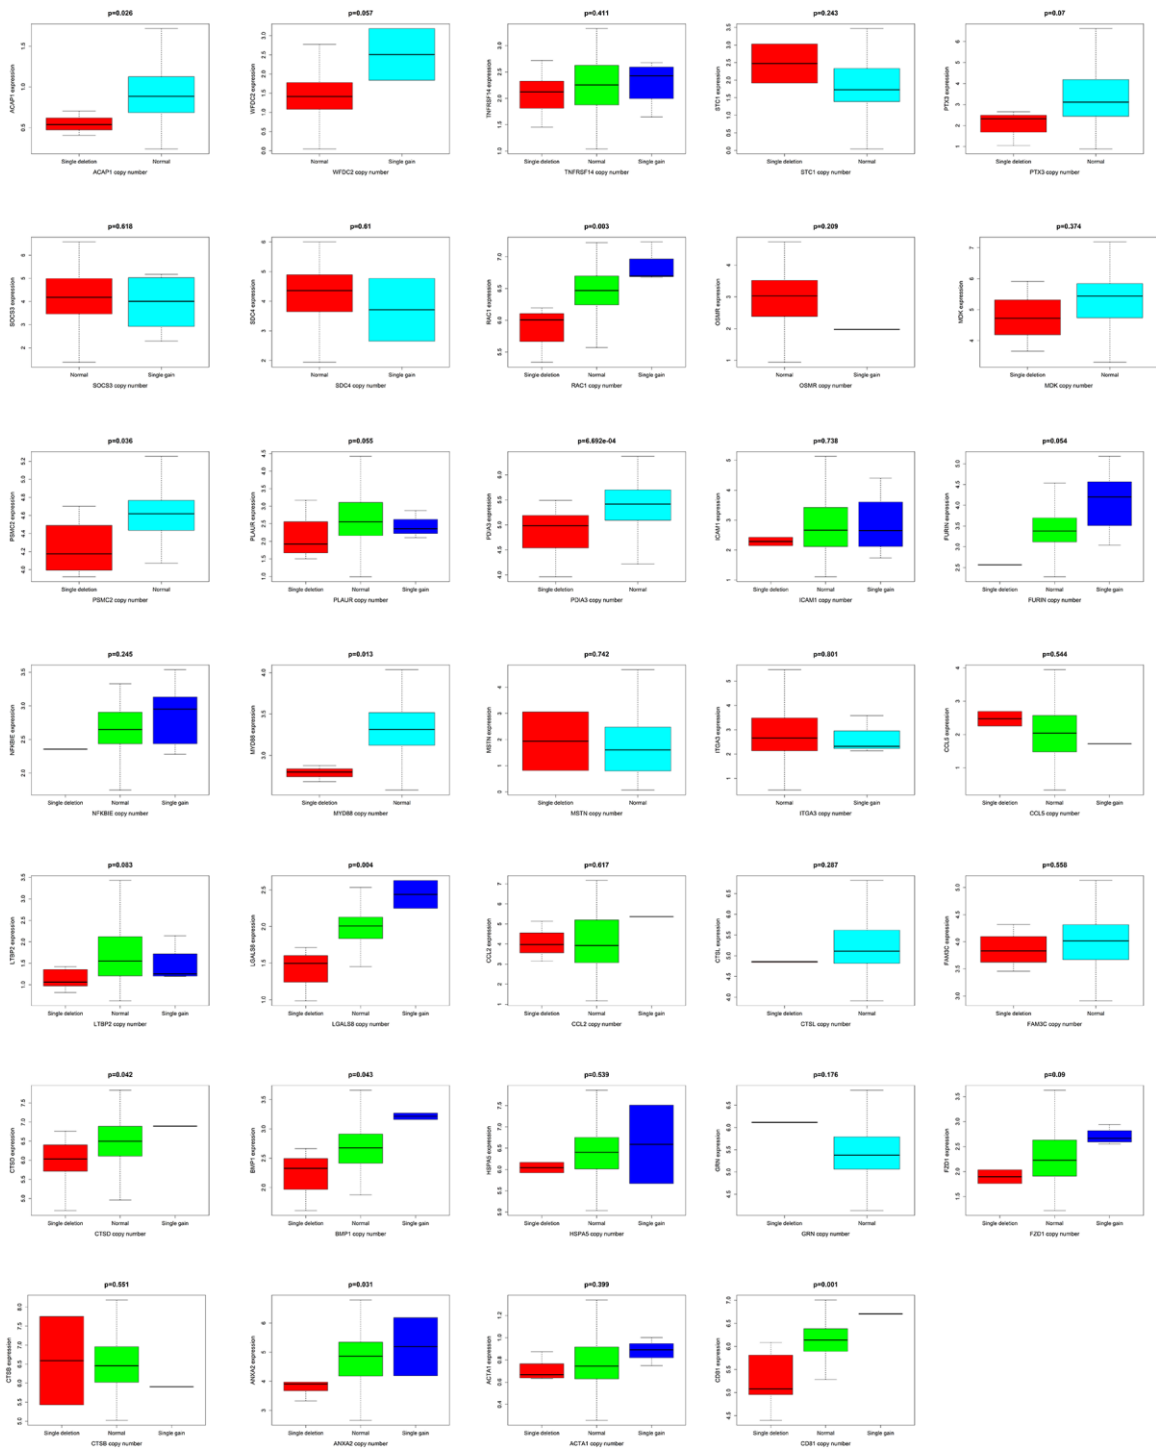

**Supplementary Figure 3. The correlation between expression level and copy number of the 35 prognostic-related immune genes.**

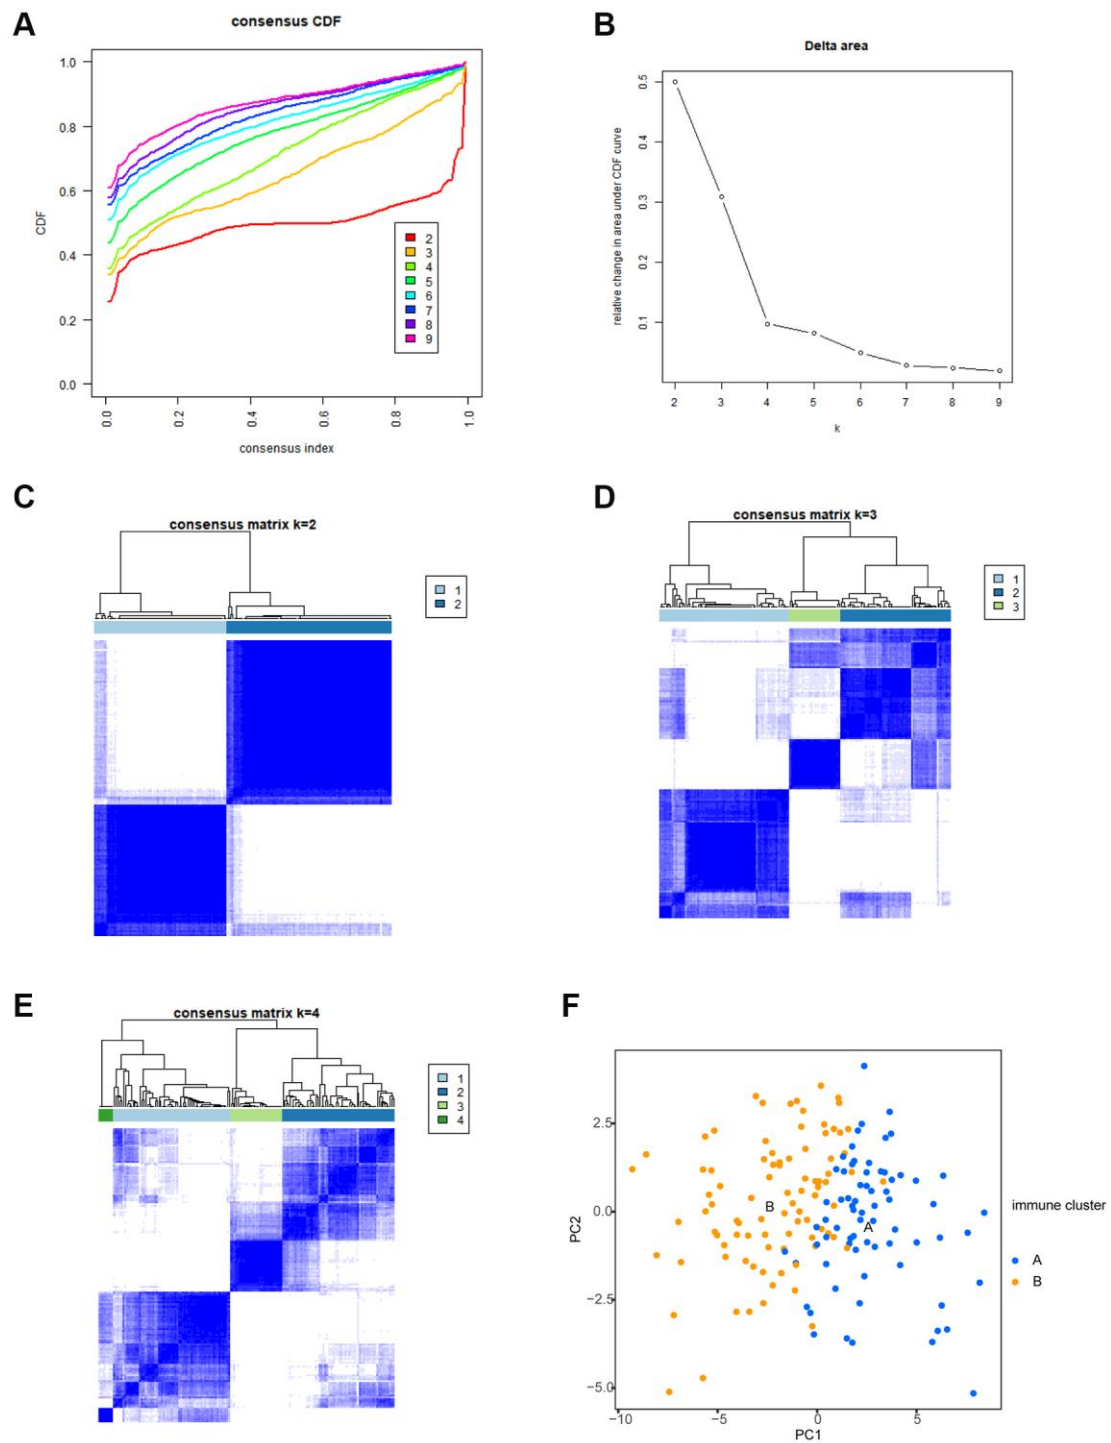

**Supplementary Figure 4. Unsupervised clustering analysis in GBM meta cohort.** (A and B) The empirical cumulative distribution function (CDF) plots show the consensus distributions for  $k$  (1–9). (C–E) Consensus matrix of TCGA-GBM dataset ( $k = 2–4$ ). (F) Principal component analysis of expression profiles in the two immune clusters.

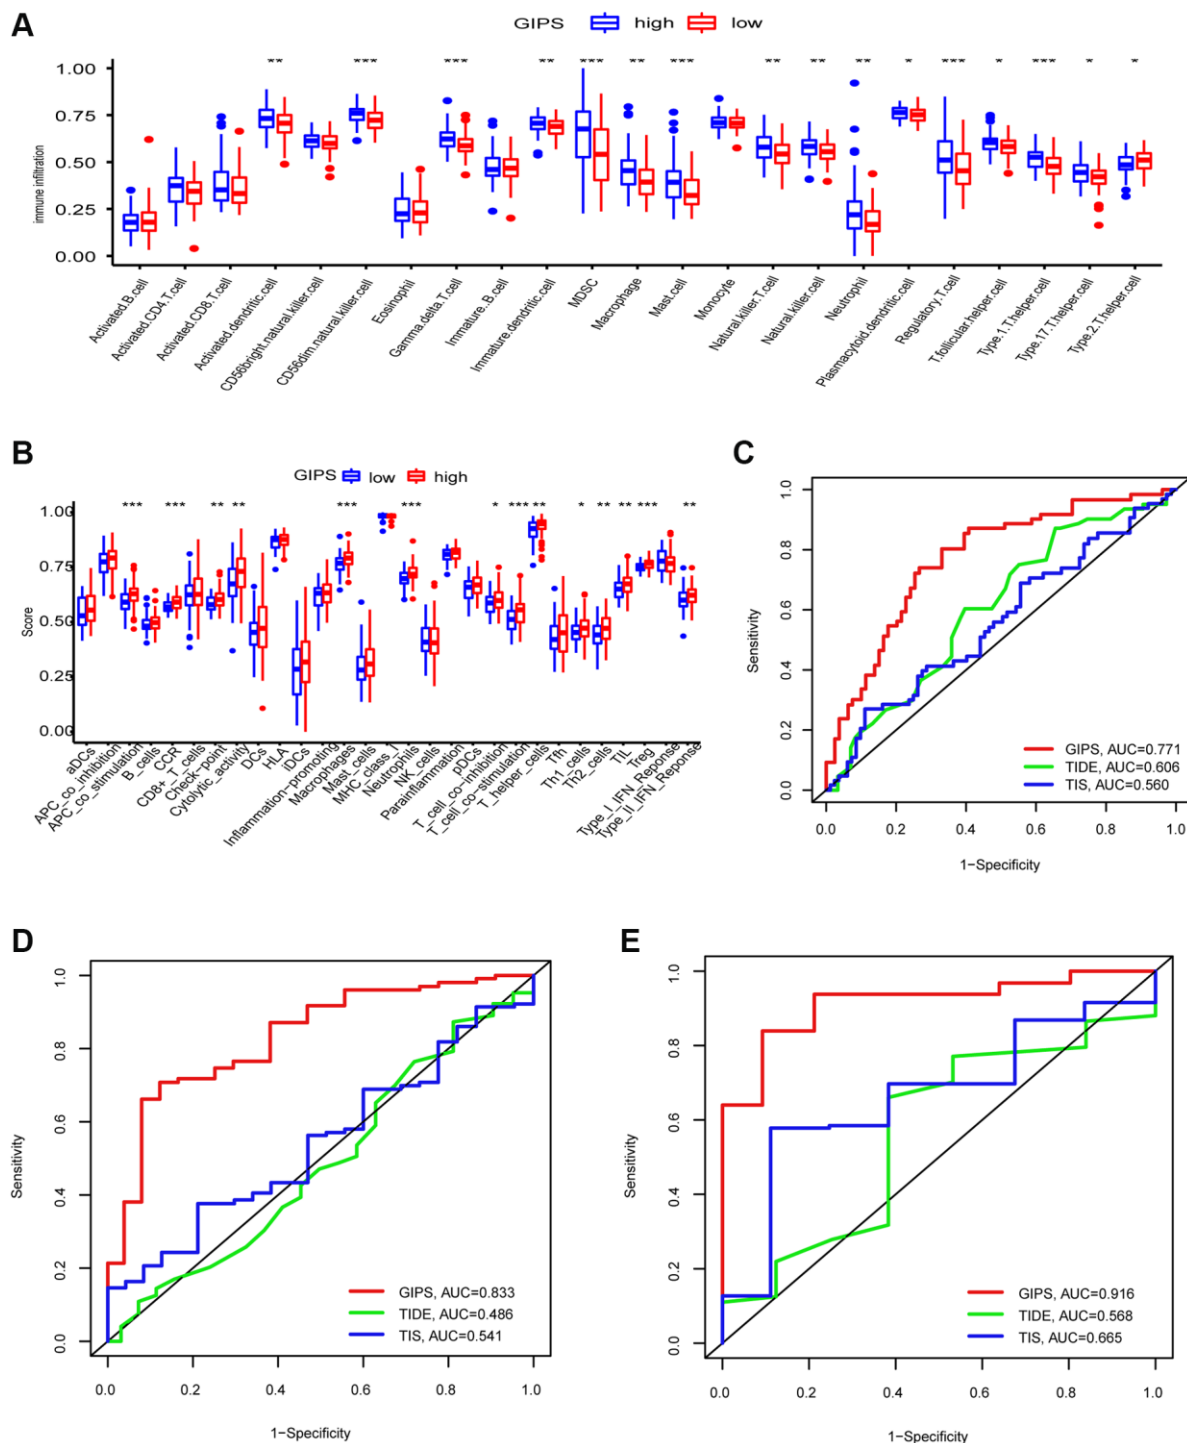

**Supplementary Figure 5. The immune cells infiltration and immune-related function of distinct GIPS subgroup.** (A) Differential analysis of immune cell abundance between two GIPS subgroups. (B) Differential of immune function between the two GIPS subgroups. (C–E) ROC analysis of GIPS, TIS, and TIDE on OS at 1-, 2-, and 3-year.
